# Supplementary material for: Antibacterial properties of Acinetobacter baumanniiphage Abp1 endolysin (PlyAB1)
Source: PubMed Central journal article supplement (PMC4274762; doi:10.1186/s12879-014-0681-2), 2014-12-12
Supplement: 12879_2014_681_MOESM2_ESM.pdf [file 12879_2014_681_MOESM2_ESM.pdf]

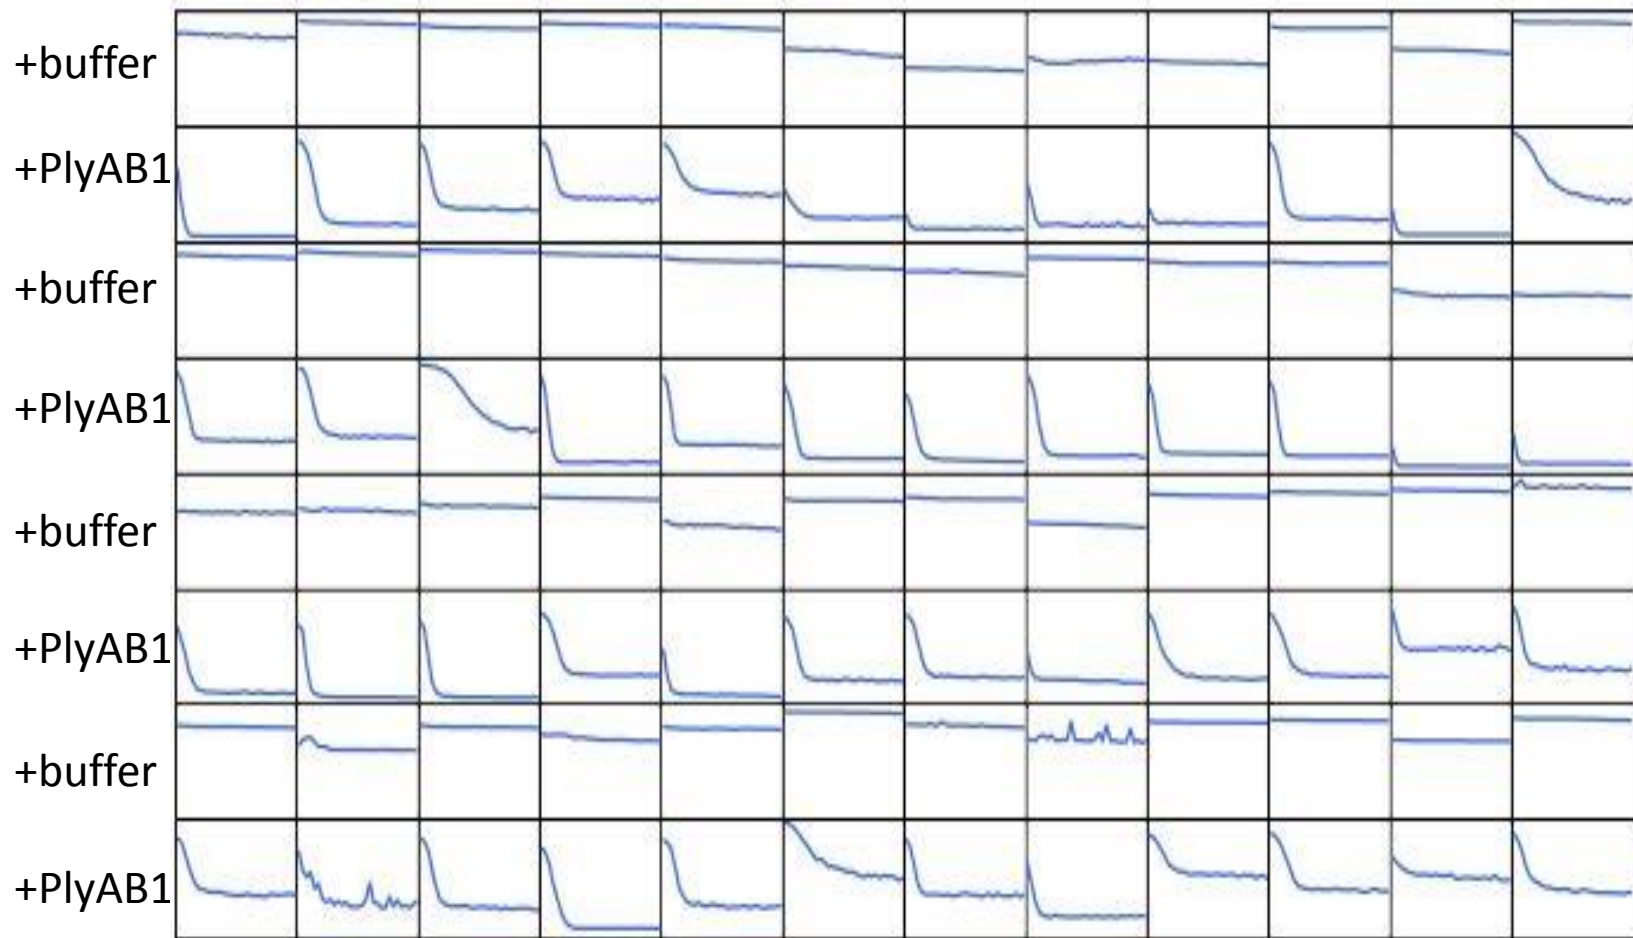

**Fig., S1 Lytic activity of PlyAB1 on clinical A . *Baumannii* isolates CQ1-CQ48**

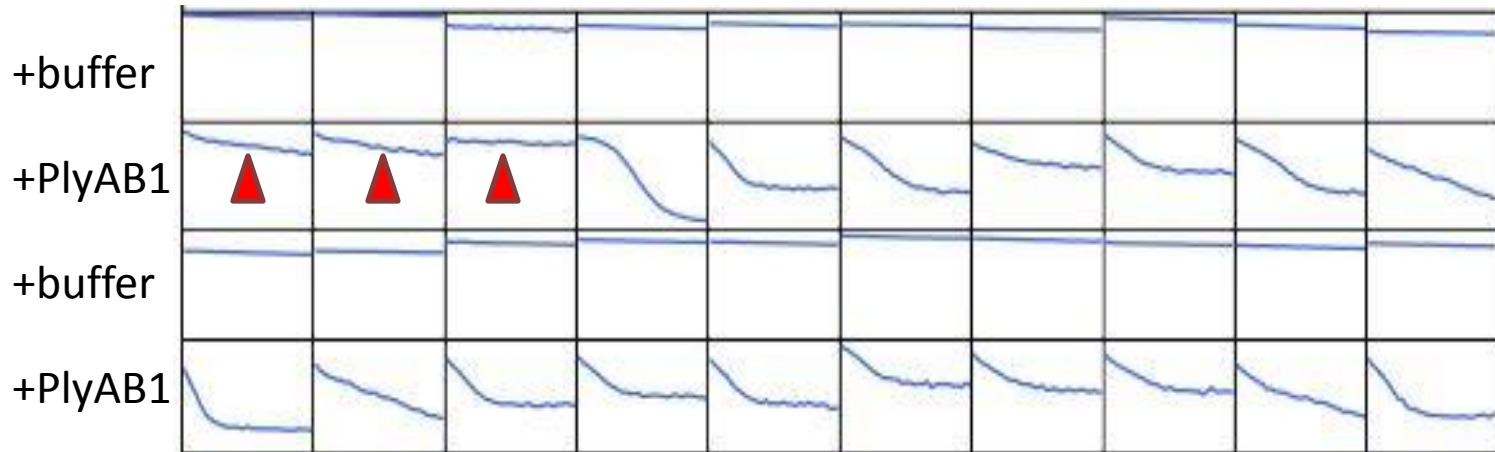

**Fig,. S2 Lytic activity of PlyAB1 on clinical *A . Baumannii* isolates CQ49-CQ68, red triangle indicates the PlyAB1-resistant strain.**

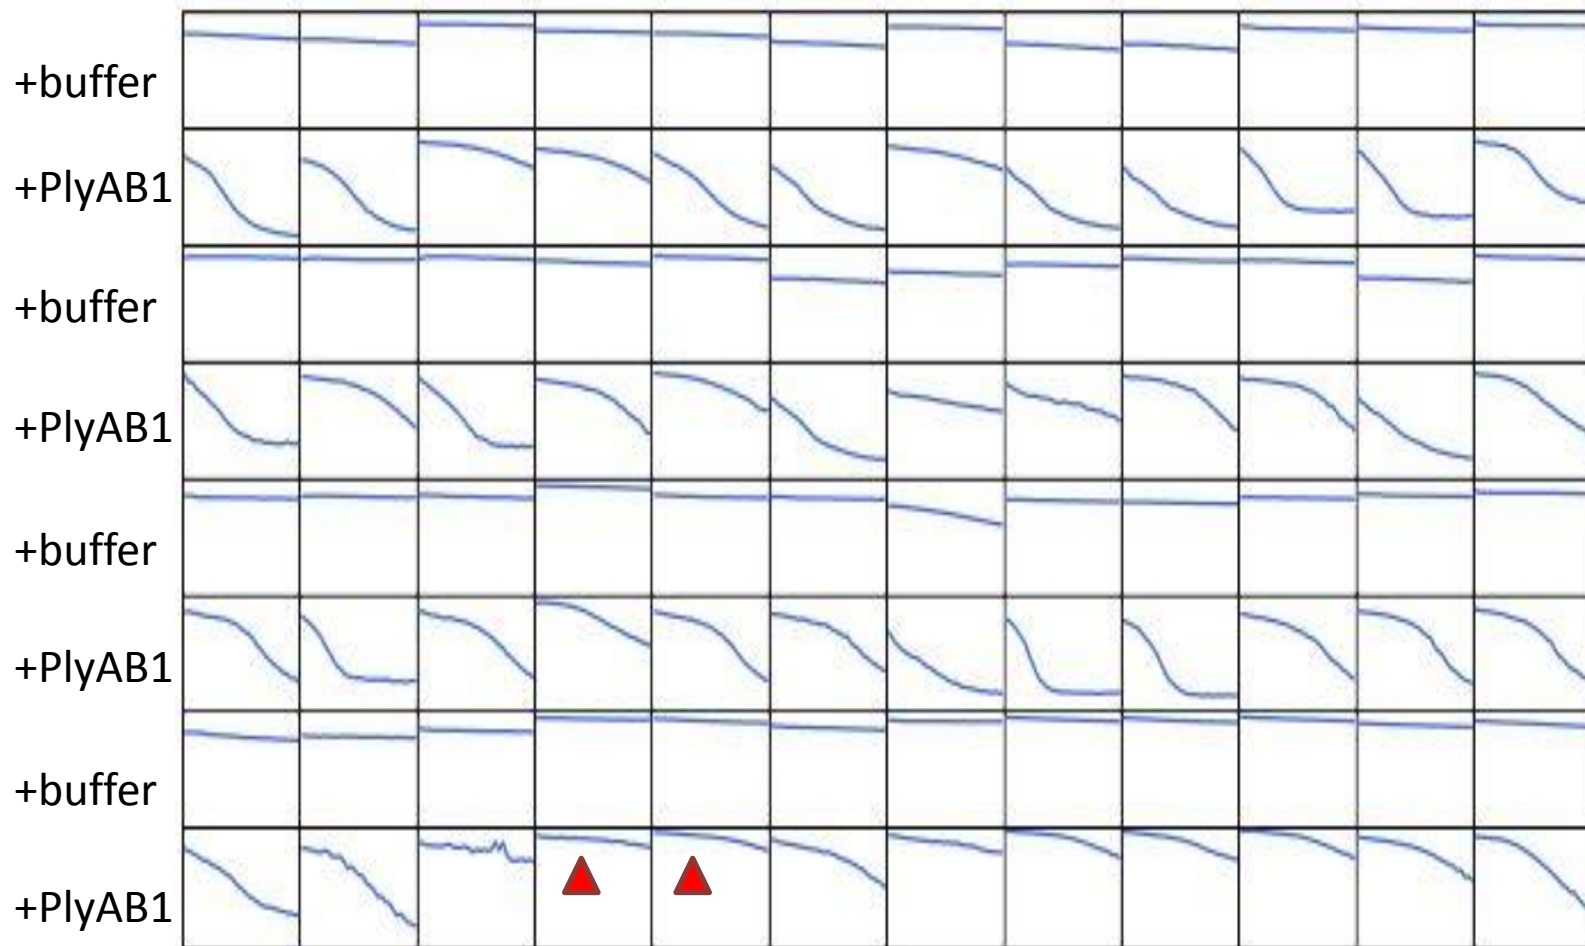

**Fig. S3 Lytic activity of PlyAB1 on clinical *A. Baumannii* isolates CQ69-CQ116, red triangle indicates the PlyAB1-resistant strain**

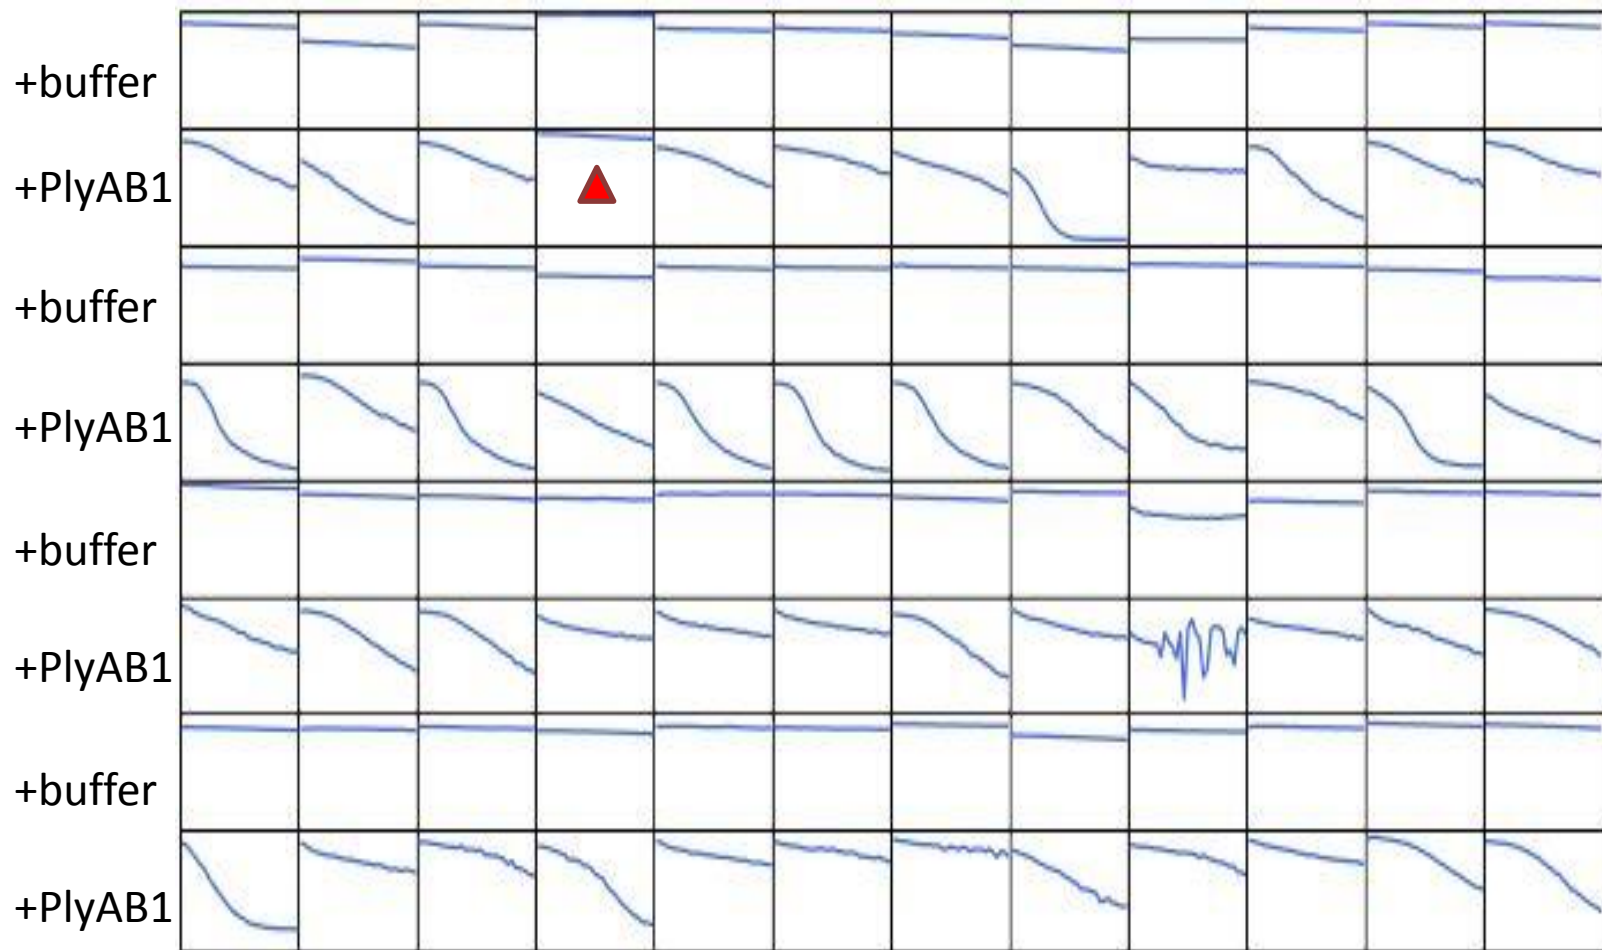

**Fig. S4 Lytic activity of PlyAB1 on clinical *A. Baumannii* isolates CQ117-CQ164 , red triangle indicates the PlyAB1-resistant strain**

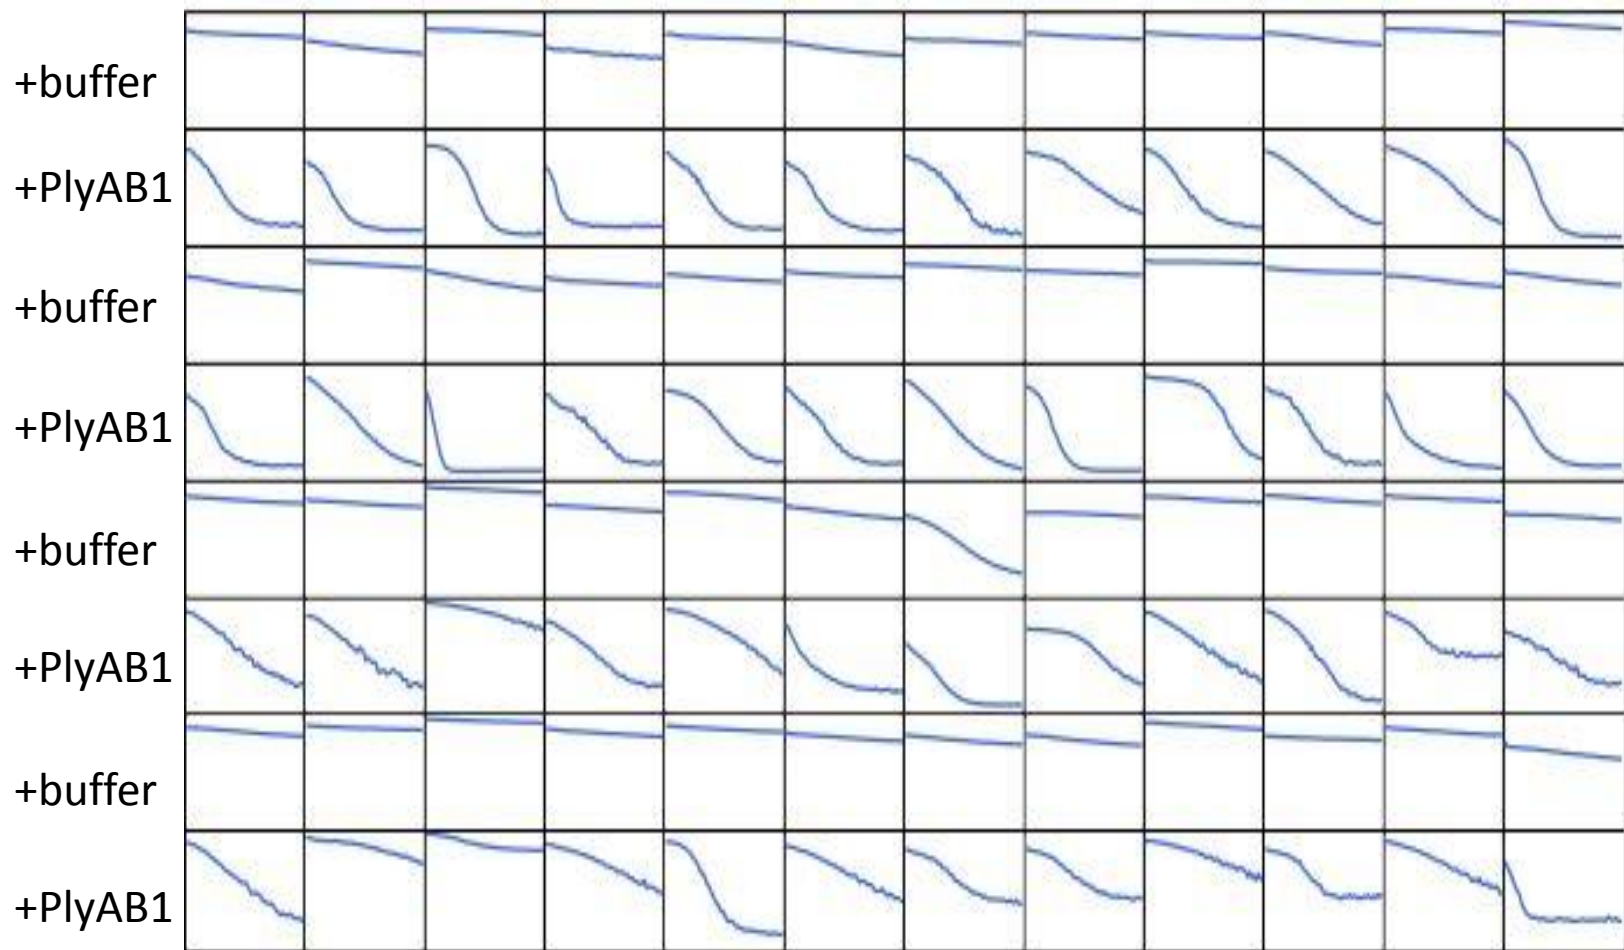

**Fig. S5 Lytic activity of PlyAB1 on clinical *A. Baumannii* isolates CQ165-CQ212**

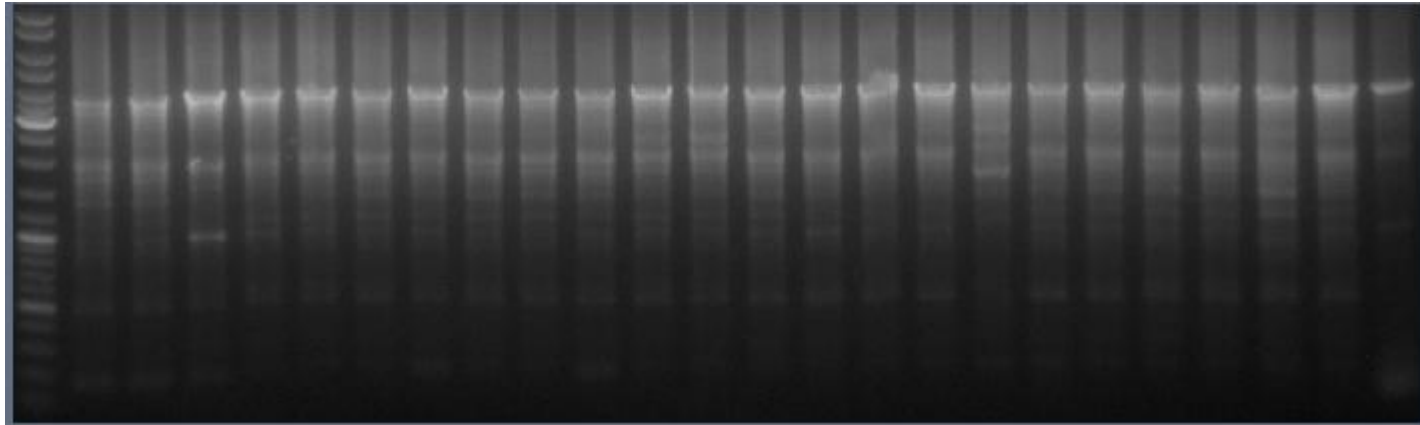

Rep-PCR AB01-AB24

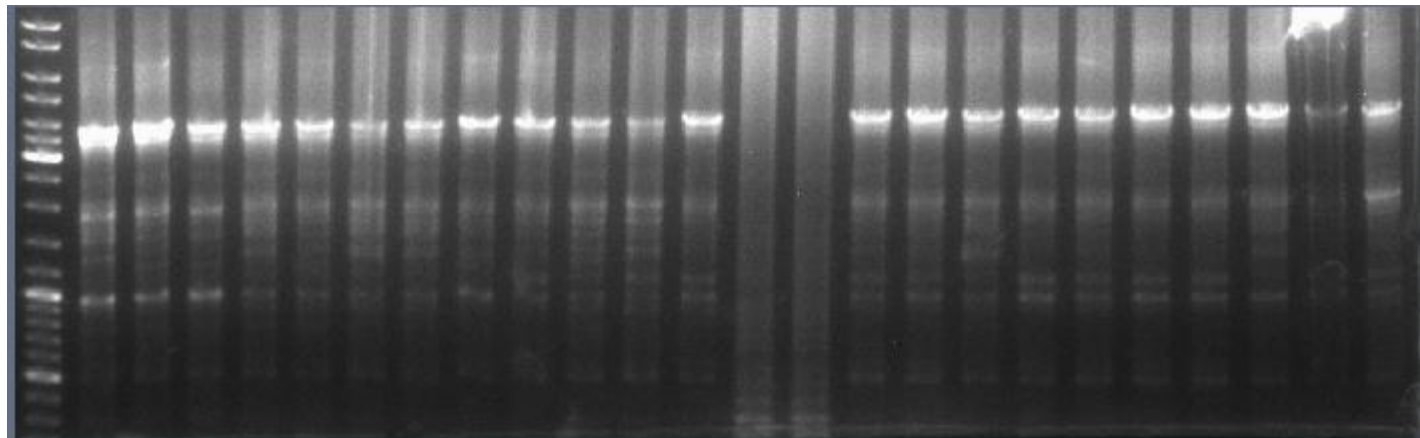

Rep-PCR AB25-AB48

**Fig. S6 Rep-PCR of 48 *A. Baumannii* isolates**
